# Supplementary material for: Antioxidant and Anti-Inflammatory Activities of Phytochemicals from Ruellia tuberosa
Source: Hindawi journal article supplement (doi:10.1155/2022/4644641), 2022-01-25
Supplement: f1 [file 4644641.f1.doc]

**SUPPLEMENTARY MATERIAL**

**Antioxidant and anti-inflammatory activities of phytochemicals from *Ruellia tuberosa***

Trinh Nhat Thi Pham,1 Tuan Trong Nguyen,2 Thuy Le Thi Nguyen,3 An Minh Nguyen Tran,4 Tuan Ngoc Nguyen,4 Danh Thanh Tong,7,8 and Dung Tien Le5,6*

*1 Department of Biochemistry, Faculty of Natural Sciences, Tiengiang University, Tiengiang, Vietnam;*
2 *Department of Chemistry, College of Natural Sciences, Can Tho University, Can Tho,Vietnam;*

*3 Department of Food Technology, Faculty of Biotechnology, Ho Chi Minh City Open University, Ho Chi Minh, Vietnam;*

*4 Industrial University of Ho Chi Minh City, HoChiMinh, Vietnam;*

*5 Department of Pharmaceutical Biochemistry, Institute of Applied Materials Science, Vietnam Academy of Science and Technology, Ho Chi Minh, Vietnam;*

*6 Graduate University of Science and Technology, Vietnam Academy of Science and Technology, Ha Noi, Vietnam;*

*7Department of Organic Chemistry, Faculty of Chemical Engineering, Ho Chi Minh City University of Technology (HCMUT), Ho Chi Minh, Vietnam;*

*8Vietnam National University Ho Chi Minh City, Linh Trung Ward, Thu Duc District, Ho Chi Minh City, Vietnam;*

Correspondence should be addressed to Dung Tien Le; inpcdung@yahoo.com

In Vietnam, the aerial parts of *Ruellia tuberosa* L. are used to treat stress oxidation and inflammatory symptoms in diabetes mellitus. The present study was designed to determine the antioxidant and inflammatory inhibition activities of *Ruellia tuberosa* L. extract (RTE) and those of the isolated compounds by column chromatography. The crude ethanol extract and ethyl acetate fraction exhibited potent antioxidant activity in the 2,2-diphenyl-1-picryl-hydrazyl-hydrate (DPPH) and 2,2-azino*bis*-(3-ethylbenzothiazoline-6-sulfonate) (ABTS) assays with an IC50 of 25.18, 14.71 (DPPH test), and 18.22, 15.27 µg/ml (ABTS test), respectively. The RTE contained high concentrations of polyphenols (308.21 mg GAE/g) and moderate concentrations of flavonoids (97.80 mg QE/g). In the anti-inflammatory screening assay, the crude ethanol extract, ethyl acetate, and methanol fractions suppressed the release of IL-6 and nitric oxide production, but the production of IL-10 was not enhanced in LPS-induced RAW 264.7 cells. Three potential anti-inflammatory compounds as hispidulin (**6**), physalin E (**7**), and physalin D (**8**) along with five other compounds named myricitrin (**1**), afzelin (**2**), apigenin (**3**), taraxerol (**4**), and lupeol (**5**) were isolated and identified from the ethyl acetate fraction. Physalin D (**8)** exhibited a strong, dose-dependent anti-inflammatory activity by inhibiting the production of IL-6 pro-inflammatory cytokines; however, the IL-10 expression was independent of its concentration in macrophages at non-cytotoxic concentrations ranging from 5–40 μg/mL. Based on the data obtained, compounds **6–8** sourced from *Ruellia tuberosa* L are potentially bioactive compounds for the treatment of inflammation symptoms in type 2 diabetes mellitus.


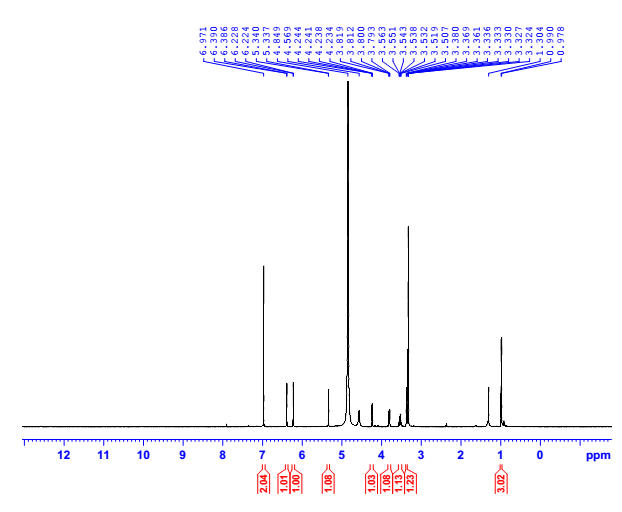


Figure S1. 1H NMR spectrum of compound **1**


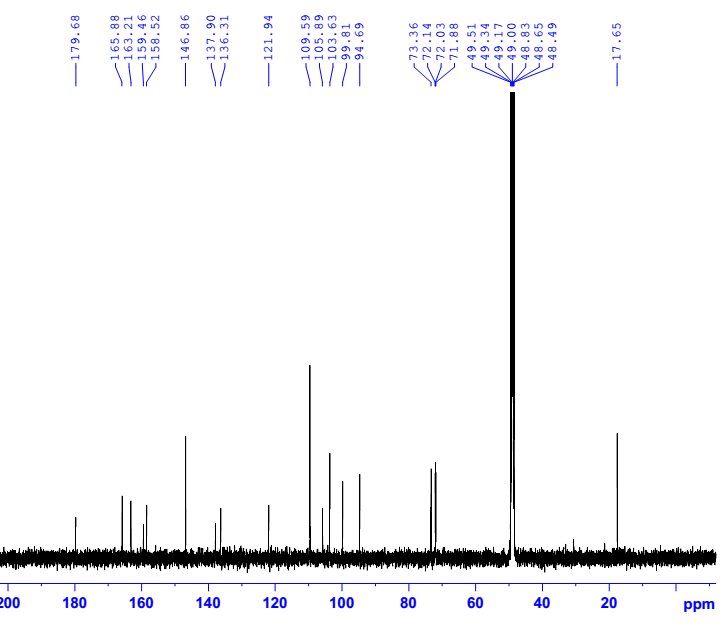


Figure S2. 13C NMR spectrum of compound **1**


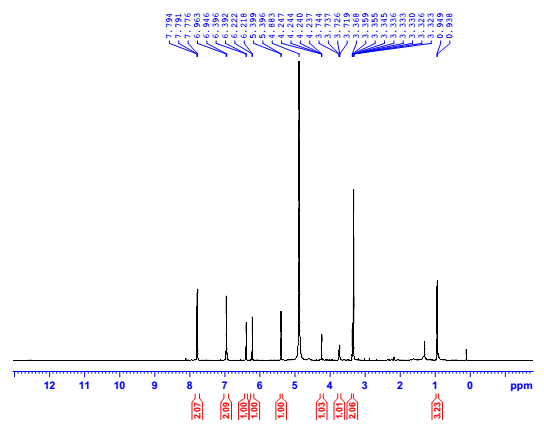


Figure S3. 1H NMR spectrum of compound **2**


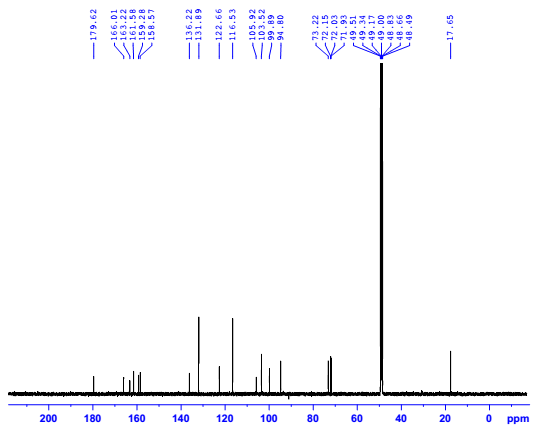


Figure S4. 13C NMR spectrum of compound **2**


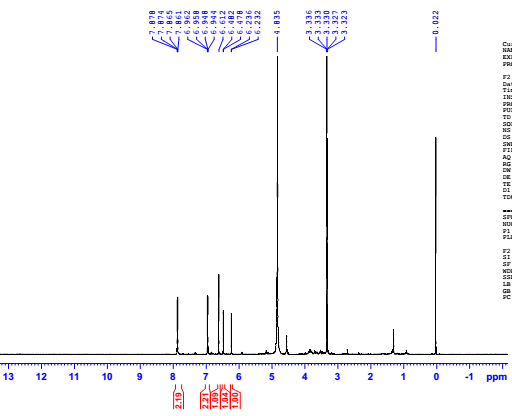


Figure S5. 1H NMR spectrum of compound **3**


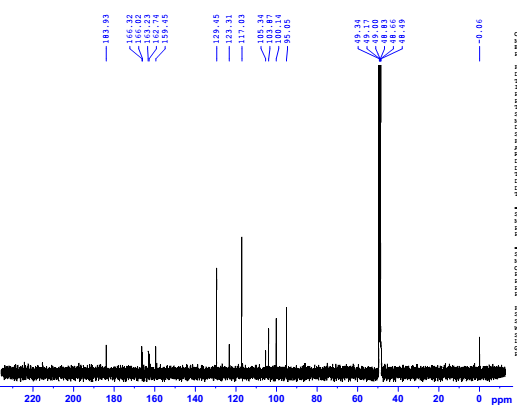


Figure S6. 13C NMR spectrum of compound **3**


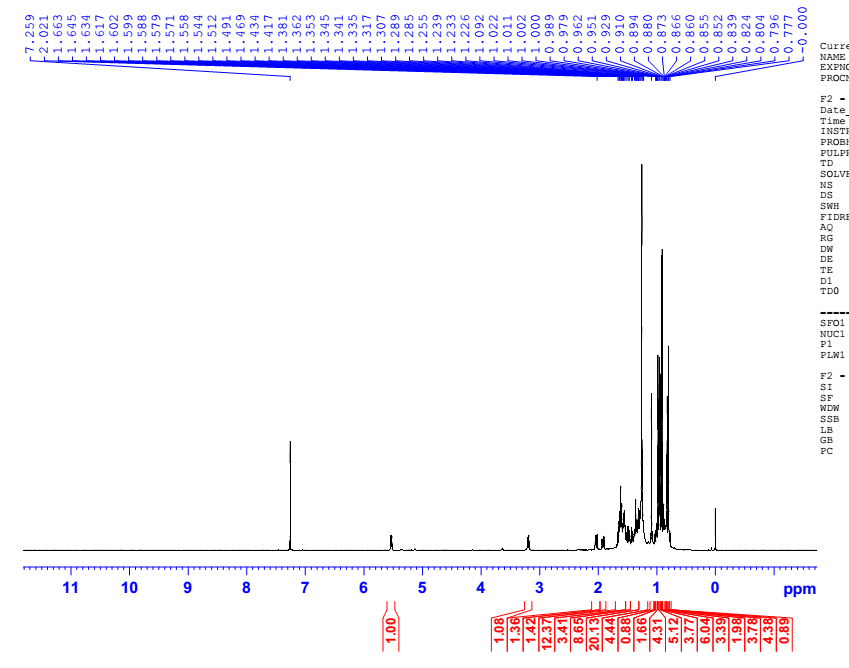


Figure S7. 1H NMR spectrum of compound **4**


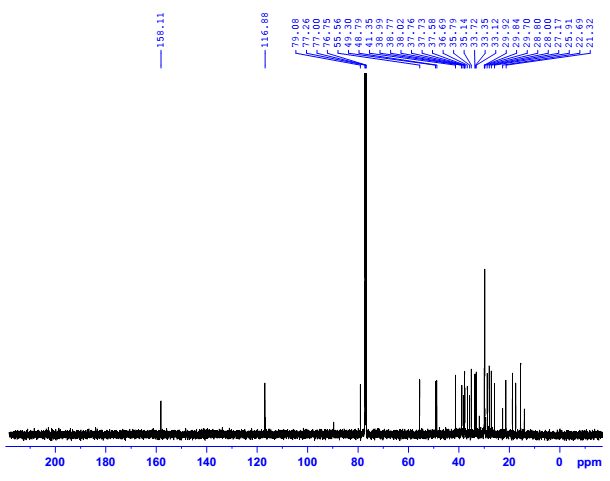


Figure S8. 13C NMR spectrum of compound **4**


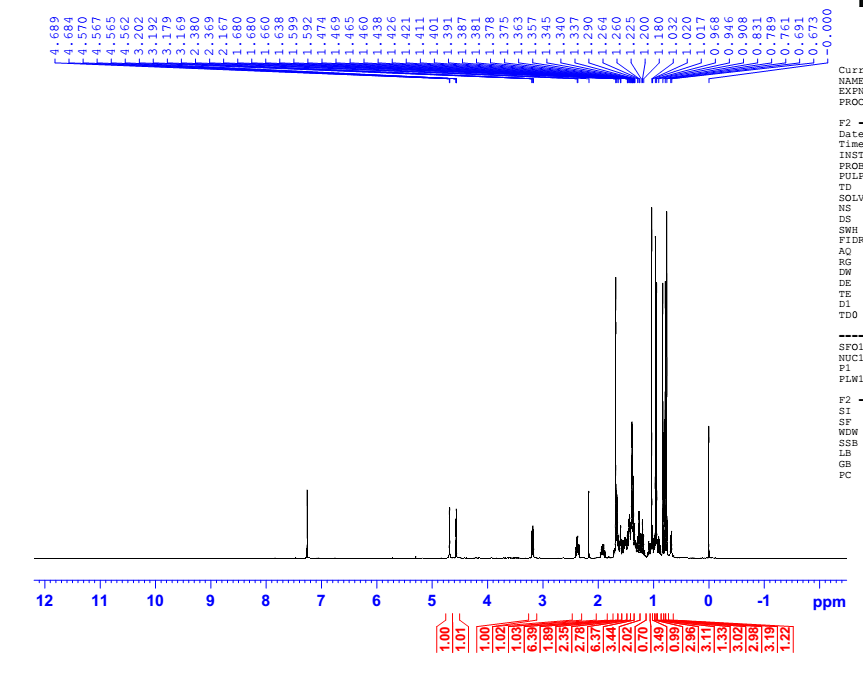


Figure S9. 1H NMR spectrum of compound **5**


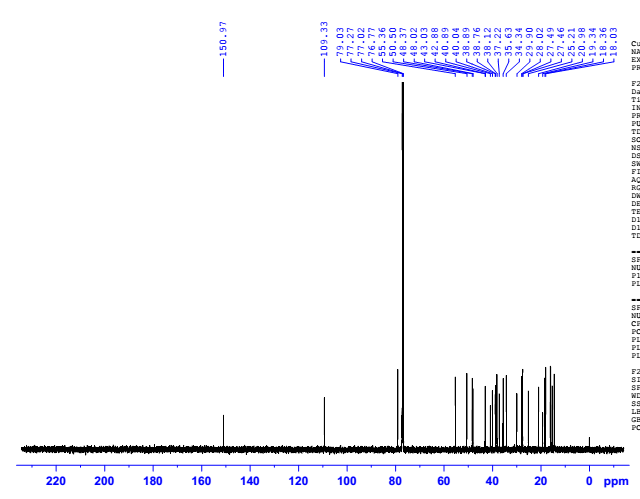


Figure S10. 13C NMR spectrum of compound **5**


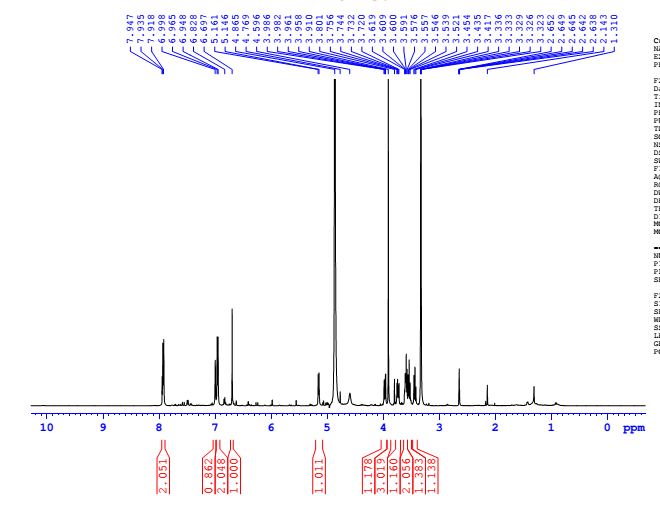


Figure S11. 1H NMR spectrum of compound **6**


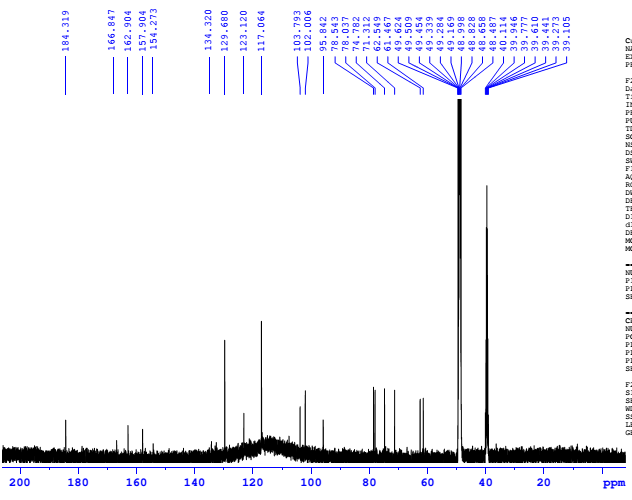


Figure S12. 13C NMR spectrum of compound **6**


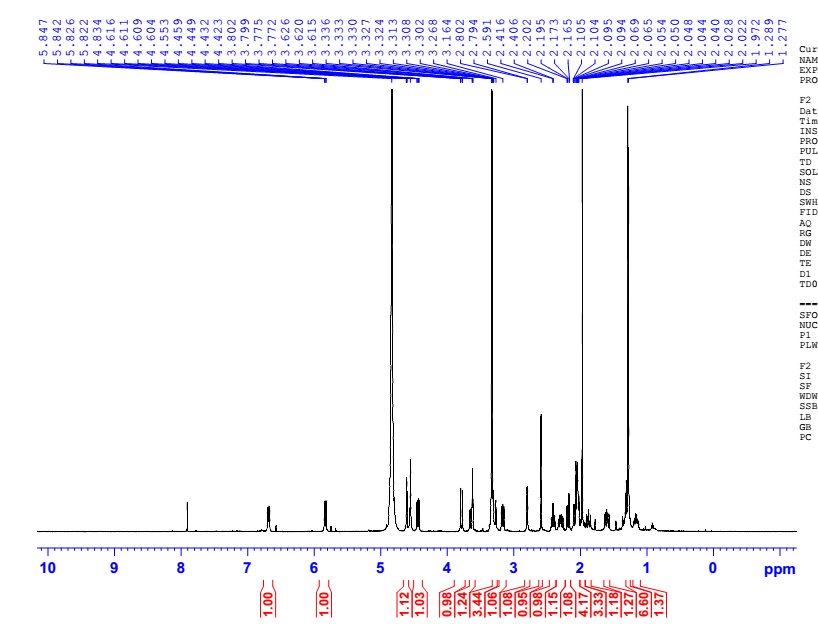


Figure S13. 1H NMR spectrum of compound **7**


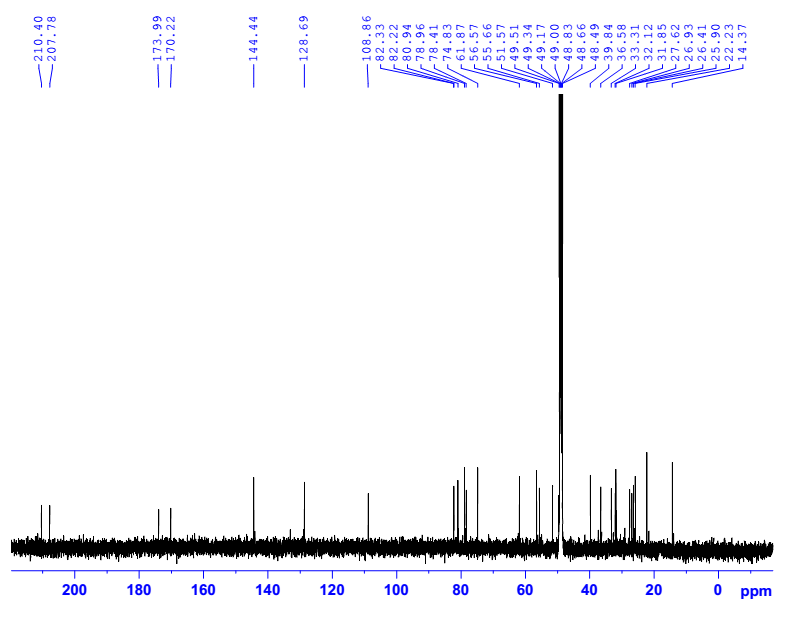


Figure S14. 13C NMR spectrum of compound **7**


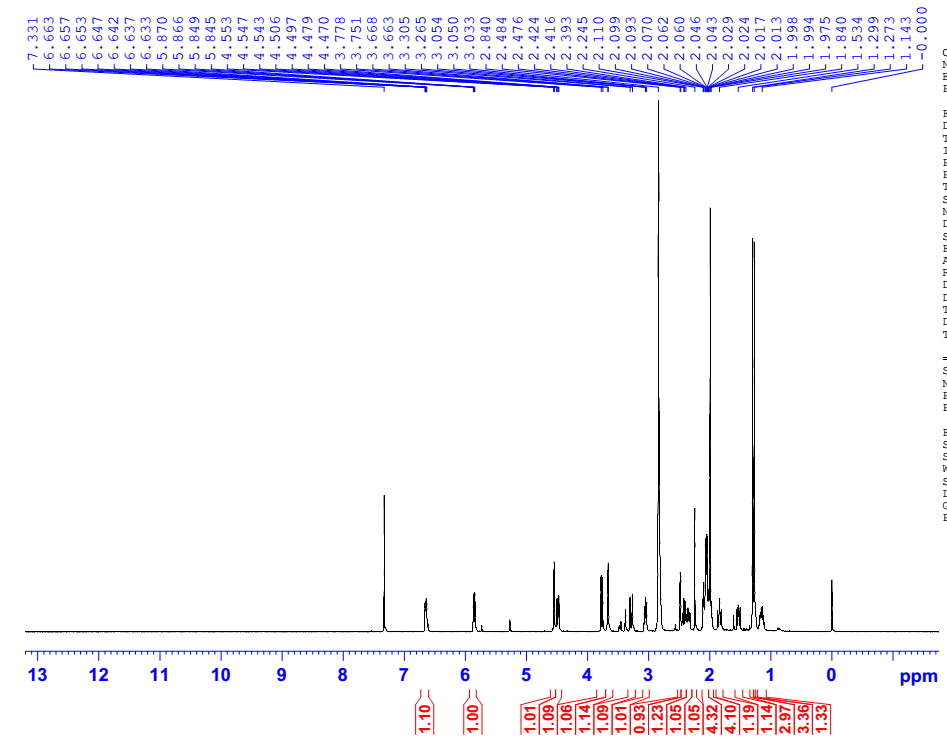


Figure S15. 1H NMR spectrum of compound **8**


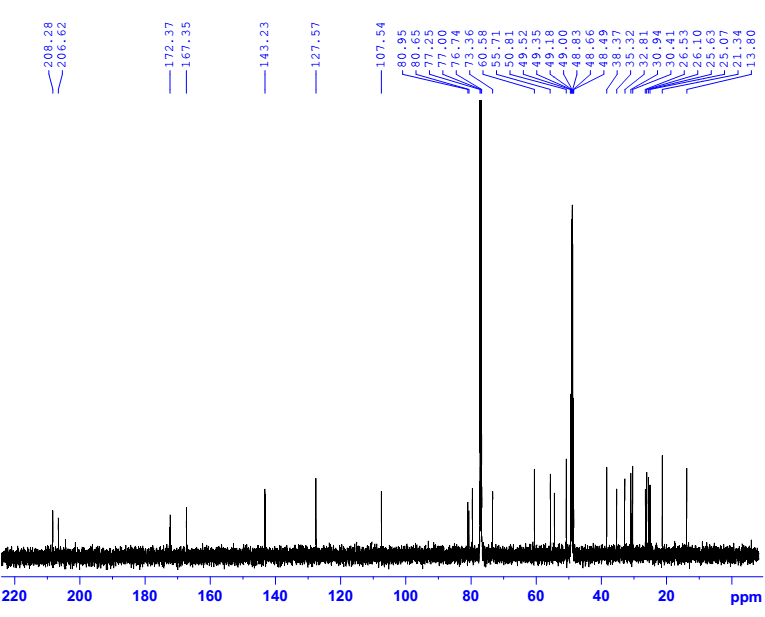


Figure S16. 13C NMR spectrum of compound **8**
